# Supplementary material for: A sensitive electrochemiluminescence immunosensor for carbohydrate antigen 12-5 analysis based on dual-function SnO2 nanoflowers
Source: Royal Society of Chemistry journal article supplement (doi:10.1039/d2sd00198e), 2023-01-01
Supplement: d2sd00198e1.pdf [file d2sd00198e1.pdf]

## **Electronic Supplementary Information**

### **A sensitive electrochemiluminescence immunosensor for carbohydrate antigen 12-5 analysis based on a dual-function SnO<sub>2</sub> nanoflowers**

Xiangfei Zheng, Dongmiao Qin, Guichun Mo, Weiming Mo and Biyang Deng\*

State Key Laboratory for Chemistry and Molecular Engineering of Medicinal Resources, School of Chemistry and Pharmaceutical Sciences, Guangxi Normal University, Guilin 541004, China

\*Corresponding Author:

Email: [dengby16@163.com](mailto:dengby16@163.com)

## Table of Contents

|                                                                                                                                                                                                                            |    |
|----------------------------------------------------------------------------------------------------------------------------------------------------------------------------------------------------------------------------|----|
| 1. X-ray photoelectron spectroscopies of SnO <sub>2</sub> NFs.....                                                                                                                                                         | S3 |
| 2. UV-vis spectrum and XRD pattern of the prepared materials.....                                                                                                                                                          | S4 |
| 3. EDS spectra of AuNPs/PEI-SnO <sub>2</sub> NFs and Ag@ZnONSs.....                                                                                                                                                        | S5 |
| 4. <b>Fig. S1.</b> XPS scans of SnO <sub>2</sub> NFs: Survey spectrum, Sn3d spectrum and O1s spectrum.....                                                                                                                 | S3 |
| 5. <b>Fig. S2.</b> UV-vis optical spectra of SnO <sub>2</sub> NFs, PEI-SnO <sub>2</sub> NFs, AuNPs and AuNPs/PEI-SnO <sub>2</sub> NFs; XRD patterns of AuNPs, SnO <sub>2</sub> NFs and AuNPs/PEI-SnO <sub>2</sub> NFs..... | S4 |
| 6. <b>Fig. S3.</b> EDS diagrams of AuNPs/PEI-SnO <sub>2</sub> NFs and Ag@ZnONSs.....                                                                                                                                       | S5 |
| 7. References.....                                                                                                                                                                                                         | S5 |

## 1. X-ray photoelectron spectroscopies of SnO<sub>2</sub>NFs

XPS characterization is used to determine the element composition and chemical oxidation valence of SnO<sub>2</sub>NFs. The binding energies obtained in the XPS analysis were corrected for specimen charging by referencing the C1s line to 284.6 eV. The result of the wide survey scan shown in Fig.S1A clearly reveals that the existence of Sn and O elements. The Sn3d spectrum showed that centered around 495.1 eV and 486.7 eV spin orbit of twin peaks (Fig.S1B), corresponding to Sn3d<sub>3/2</sub> and Sn3d<sub>5/2</sub>, respectively, indicating that Sn<sup>4+</sup> in SnO<sub>2</sub> is in a normal oxidation valence, which consistent with the reported on the SnO<sub>2</sub> structure.<sup>1,2</sup> As shown in Fig.S1C, the O1s spectrum showed the binding energies of 530.7 eV could be the lattice oxygen of SnO<sub>2</sub>.<sup>3</sup>

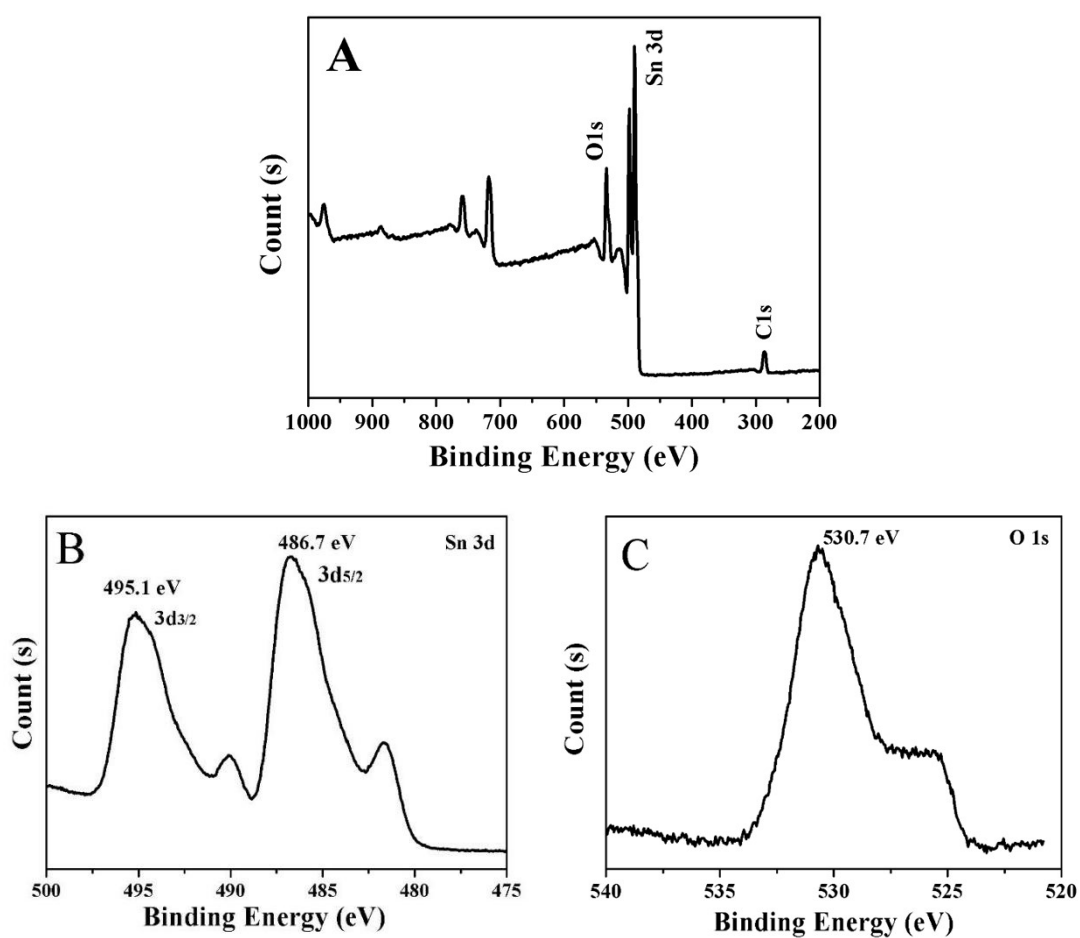

**Fig. S1.** XPS scans of SnO<sub>2</sub>NFs: Survey spectrum (A), Sn3d spectrum (B) and O1s spectrum (C).

## 2. UV-vis spectra and XRD pattern of the prepared materials

The SnO<sub>2</sub>NFs, PEI-SnO<sub>2</sub>NFs, AuNPs and AuNPs/PEI-SnO<sub>2</sub>NFs composites were investigated by UV-vis. As shown in Fig.S2A, SnO<sub>2</sub>NFs presented a characteristic peak at 325 nm (curve a). Compared with SnO<sub>2</sub>NFs, the absorption peak of PEI-SnO<sub>2</sub>NFs was red shifted to 337 nm (curve b). PVP-AuNPs showed a main peak at 538 nm and a shoulder peak at 620 nm (curve c). The AuNPs/PEI-SnO<sub>2</sub>NFs composite (curve d) showed the same absorption wavelength range both PEI-SnO<sub>2</sub>NFs and PVP-AuNPs, indicating the successful preparation of AuNPs/PEI-SnO<sub>2</sub>NFs composites. Fig.S2B presented the XRD patterns of AuNPs (curve a), SnO<sub>2</sub>NFs (curve b) and AuNPs/PEI-SnO<sub>2</sub>NFs (curve c). It is observed from that the 2θ of SnO<sub>2</sub>NFs diffraction peaks are 26°, 34°, 37°, 52° and 61°, corresponding to (110), (101), (200), (211) and (310) crystal surfaces, respectively. The crystal plane shows good crystallinity.<sup>4</sup> It can be found that the XRD peaks of AuNPs/PEI-SnO<sub>2</sub>NFs were completely coincided with SnO<sub>2</sub>NFs and AuNPs, the diffraction peaks of AuNPs in 38.2° (111), 44.3° (200), 64.6° (220), 77.3° (311), respectively.<sup>5</sup> It can be concluded that the AuNPs was successfully fixed on the surface of SnO<sub>2</sub>NFs.

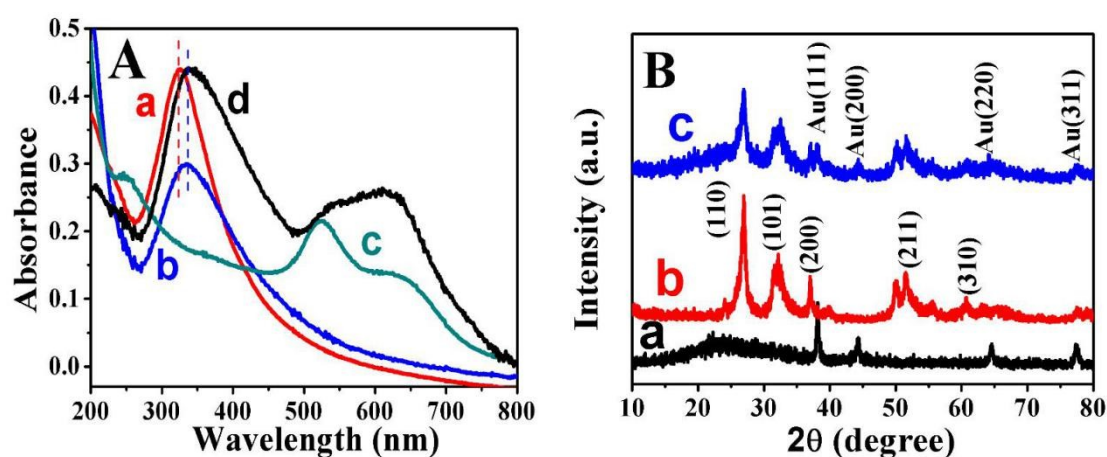

**Fig. S2.** (A) UV-vis optical spectra of SnO<sub>2</sub>NFs (a), PEI-SnO<sub>2</sub>NFs (b), AuNPs (c) and AuNPs/PEI-SnO<sub>2</sub>NFs (d); (B) XRD patterns of AuNPs (a), SnO<sub>2</sub>NFs (b) and AuNPs/PEI-SnO<sub>2</sub>NFs (c).

## 3. EDS spectra of AuNPs/PEI-SnO<sub>2</sub>NFs and Ag@ZnONSs

The elemental analysis of the AuNPs/PEI-SnO<sub>2</sub>NFs and Ag@ZnONSs composite was further studied by EDS spectra. As shown in Fig.S3A, AuNPs/PEI-SnO<sub>2</sub>NFs composite mainly contains three elements of 73.56% Sn, 23.55% O and 2.89% Au, indicating that the AuNPs were grown on the surface of SnO<sub>2</sub>NFs successfully. It could be observed from Fig.S3B that the major elements of Ag@ZnONSs composite were 25.88% Zn, 14.21% O and 59.91% Ag, indicating that the AgNPs were reduced to the surface of ZnONSs successfully.

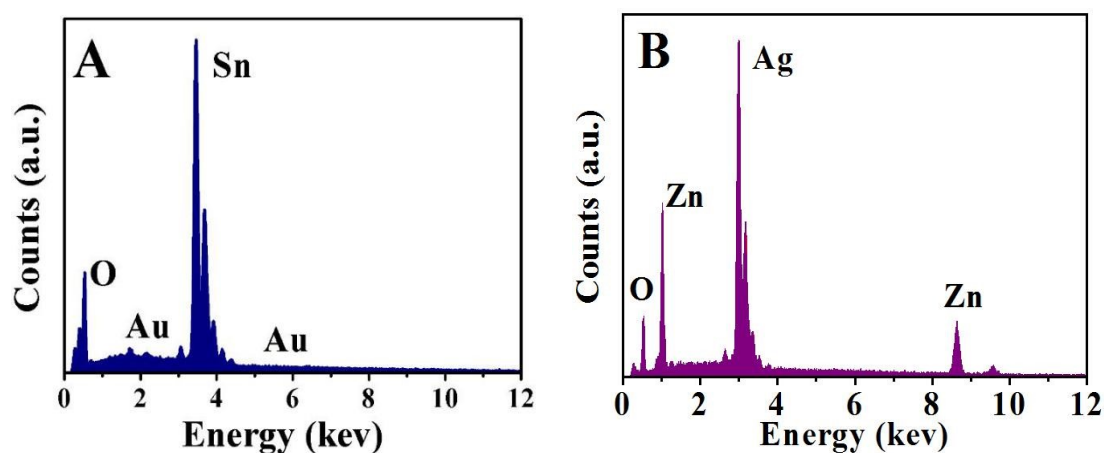

**Fig. S3.** EDS diagrams of AuNPs/PEI-SnO<sub>2</sub>NFs (A) and Ag@ZnONSs (B).

## References

- 1 J. Zhang, X. Liu, S. Wu, M. Xu, X. Guo and S. Wang, *J. Mater. Chem.*, 2010, **20**, 6453-6459.
- 2 S. Wang, J. Yang, H. Zhang, Y. Wang, X. Gao, L. Wang and Z. Zhu, *Sensor. Actuat. B-Chem.*, 2015, **207**, 83-89.
- 3 H. Chen, X. Pu, M. Gu, J. Zhu and L. Cheng, *Ceram. Int.*, 2016, **42**, 17717-17722.
- 4 D. Narsimulu, S. Vinoth, E. S. Srinadhu and N. Satyanarayana, *Ceram. Int.*, 2018, **44**, 201-207.
- 5 H. Zhou, N. Gan, T. Li, Y. Cao, S. Zeng, L. Zheng and Z. Guo, *Anal. Chim. Acta*, 2012, **746**, 107-113.
